# Supplementary material for: Adsorption isotherms and mechanisms of Cu(ii) sorption onto TEMPO-mediated oxidized cellulose nanofibers
Source: Royal Society of Chemistry journal article supplement (doi:10.1039/c6ra22397d), 2016-01-01
Supplement: c6ra22397d1.pdf [file c6ra22397d1.pdf]

### Electronic Supplementary Information (ESI)

Element analysis was conducted on the surface of copper-containing nanoparticles by using energy dispersive X-ray spectroscopy (EDS).

#### Test 1

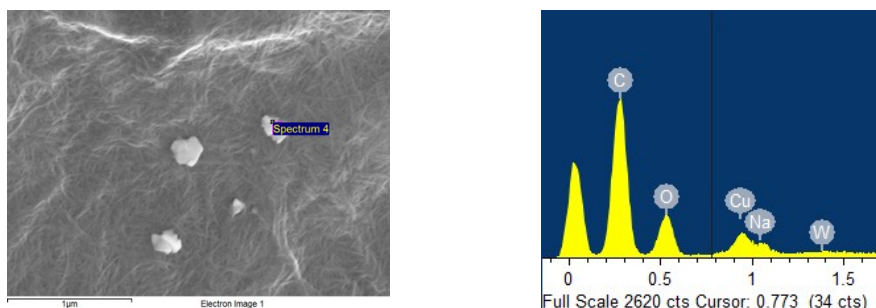

Fig. 1: SEM image (left) and EDS analysis (right) of TOCNF surface after Cu(II) sorption (analysis point one)

| Element | Weight% | Atomic% |
|---------|---------|---------|
| C K     | 63.59   | 73.06   |
| O K     | 29.49   | 25.44   |
| Cu L    | 6.91    | 1.50    |
| Totals  | 100.00  |         |

#### Test 2

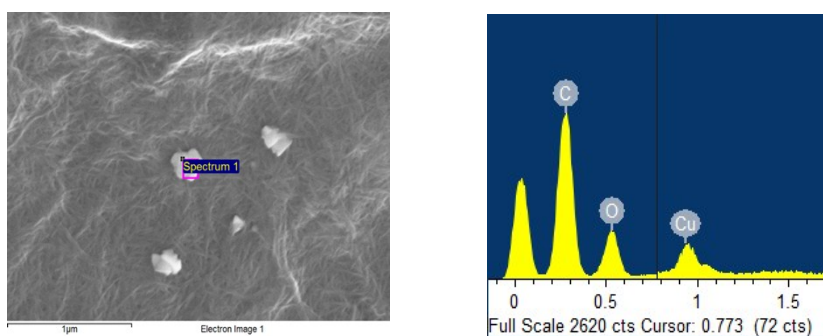

Fig. 2: SEM image (left) and EDS analysis (right) of TOCNF surface after Cu(II) sorption. (analysis point two)

| Element | Weight% | Atomic% |
|---------|---------|---------|
| C K     | 62.37   | 73.34   |
| O K     | 27.71   | 24.46   |
| Cu L    | 9.92    | 2.20    |
| Totals  | 100.00  |         |
